# Supplementary material for: Structure, EPR/ENDOR and DFT characterisation of a [CuII(en)2](OTf)2 complex
Source: Royal Society of Chemistry journal article supplement (doi:10.1039/c3dt51694f), 2013-01-01
Supplement: c3dt51694f.pdf [file c3dt51694f.pdf]

# Structure, EPR/ENDOR and DFT characterisation of a [Cu<sup>II</sup>(en)<sub>2</sub>](OTf)<sub>2</sub> complex.

E. Louise Hazeland, Emma Carter\*, Damien M. Murphy and Benjamin D. Ward\*

## Electronic Supplementary Information

### Contents

1. X-ray data.
2. Computational data.
3. Additional X-band CW and pulsed EPR and ENDOR data.

**Table S1.** X-ray data for [Cu(en)<sub>2</sub>](OTf)<sub>2</sub> **1**

|                          | <b>1</b>                                                                                     |
|--------------------------|----------------------------------------------------------------------------------------------|
| Empirical formula        | C <sub>6</sub> H <sub>16</sub> CuF <sub>6</sub> N <sub>4</sub> O <sub>6</sub> S <sub>2</sub> |
| Formula weight           | 481.89                                                                                       |
| Crystal size/mm          | 0.18 × 0.10 × 0.02                                                                           |
| Crystal system           | Monoclinic                                                                                   |
| Space group              | <i>P</i> 2 <sub>1</sub> / <i>n</i>                                                           |
| <i>a</i> /Å              | 16.7332(6)                                                                                   |
| <i>b</i> /Å              | 10.3150(4)                                                                                   |
| <i>c</i> /Å              | 20.3164(14)                                                                                  |
| $\alpha$ /°              | 90                                                                                           |
| $\beta$ /°               | 101.664(7)                                                                                   |
| $\gamma$ /°              | 90                                                                                           |
| <i>V</i> /Å <sup>3</sup> | 3434.3(3)                                                                                    |

|                                                     |                                                                 |
|-----------------------------------------------------|-----------------------------------------------------------------|
| <i>Z</i>                                            | 8                                                               |
| <i>D<sub>c</sub></i> /Mg m <sup>-3</sup>            | 1.864                                                           |
| <i>μ</i> /mm <sup>-1</sup>                          | 1.609                                                           |
| <i>T</i> /K                                         | 100(2)                                                          |
| <i>F</i> (000)                                      | 1944                                                            |
| Refl. collected                                     | 23245                                                           |
| Refl. indep. ( <i>R</i> <sub>int</sub> )            | 7846 (0.0242)                                                   |
| Data/rest./par.                                     | 7846/16/515                                                     |
| Goodness of fit on <i>F</i> <sup>2</sup>            | 1.097                                                           |
| Final <i>R</i> indices [ <i>I</i> > 2σ( <i>I</i> )] | <i>R</i> <sub>1</sub> = 0.0251, <i>wR</i> <sub>2</sub> = 0.0683 |
| <i>R</i> indices (all data)                         | <i>R</i> <sub>1</sub> = 0.0301, <i>wR</i> <sub>2</sub> = 0.0703 |
| Largest residual peak and hole/e Å <sup>-3</sup>    | 0.497 and -0.362                                                |

---

## 2. Computational data

All calculations were performed using the Gaussian 09 program. The structure of [Cu(en)<sub>2</sub>(OTf)<sub>2</sub>] **1** was optimised without geometry restraints using the unrestricted B3LYP hybrid functional, employing the 6-31+G(d,p) basis set on all atoms. The geometry optimisation was followed by a frequency calculation to ascertain the nature of the stationary point (minimum vs. saddle point). TD-DFT calculations were performed on the optimised geometry.

Cartesian coordinates of [Cu(en)<sub>2</sub>](OTf)<sub>2</sub> **1**.

|    |          |          |          |
|----|----------|----------|----------|
| Cu | -0.00106 | 0.0005   | -0.00075 |
| H  | 0.60215  | 1.61567  | 1.85931  |
| H  | -1.06016 | 1.55655  | 1.80837  |
| H  | 1.37653  | 1.05136  | -1.84765 |
| H  | -0.22125 | 1.48595  | -2.0889  |
| S  | 3.27949  | -0.58813 | -0.13393 |
| S  | -3.28021 | 0.58815  | 0.13715  |
| H  | 1.06163  | -1.55383 | -1.80728 |
| H  | -0.60063 | -1.61515 | -1.86255 |
| H  | 0.22527  | -1.4851  | 2.08588  |
| H  | -1.37362 | -1.05119 | 1.84936  |
| F  | 4.74655  | 1.63167  | -0.02573 |
| F  | 5.29814  | 0.12629  | 1.45138  |
| F  | 5.85612  | -0.14266 | -0.6382  |
| F  | -4.74341 | -1.63373 | 0.01825  |
| F  | -5.29676 | -0.12269 | -1.45232 |
| F  | -5.85632 | 0.13589  | 0.63814  |
| O  | 2.3321   | 0.06072  | 0.83046  |
| O  | 3.55364  | -2.00834 | 0.13748  |
| O  | 2.95992  | -0.25663 | -1.55368 |

|   |          |          |          |
|---|----------|----------|----------|
| O | -2.33142 | -0.05516 | -0.8297  |
| O | -3.55655 | 2.00897  | -0.12861 |
| O | -2.96077 | 0.25128  | 1.55556  |
| N | -0.2117  | 1.63365  | 1.24504  |
| N | 0.52441  | 1.40115  | -1.39957 |
| N | 0.21171  | -1.6325  | -1.24633 |
| N | -0.52253 | -1.40035 | 1.39882  |
| C | -0.22766 | 2.86715  | 0.41522  |
| H | 0.00907  | 3.75772  | 1.00867  |
| H | -1.24196 | 2.97949  | 0.02198  |
| C | 0.78181  | 2.69545  | -0.71721 |
| H | 0.7257   | 3.5393   | -1.4137  |
| H | 1.79866  | 2.65086  | -0.31826 |
| C | 0.22714  | -2.86623 | -0.41685 |
| H | 1.24154  | -2.97953 | -0.02406 |
| H | -0.0105  | -3.75646 | -1.01043 |
| C | -0.78133 | -2.69435 | 0.71648  |
| H | -1.79866 | -2.64905 | 0.31889  |
| H | -0.72486 | -3.53842 | 1.4127   |
| C | 4.89898  | 0.30764  | 0.18329  |
| C | -4.89796 | -0.30902 | -0.18489 |

**TD-DFT calculated excited state:**

Multiplicity and symmetry: 2.001-A

Energy: 2.3134 eV, 535.95 nm

Oscillator strength: f=0.0000

S<sup>2</sup>: 0.751

Principal Orbital contributions:

|             |       |
|-------------|-------|
| 107B ->122B | 38.7% |
| 110B ->122B | 50.7% |
| 112B ->122B | 1.5%  |
| 119B ->122B | 3.1%  |
| 121B ->122B | 3.6%  |

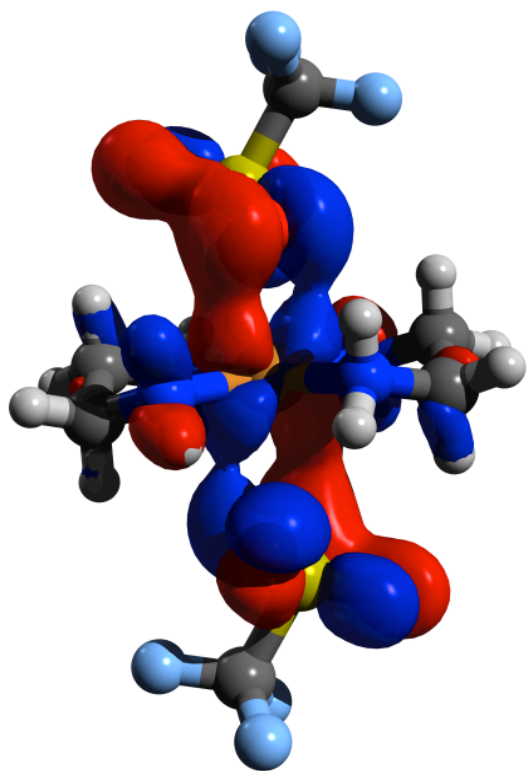

**Fig S1a;** Molecular orbital 107B of  $[\text{Cu}(\text{en})_2](\text{OTf})_2$

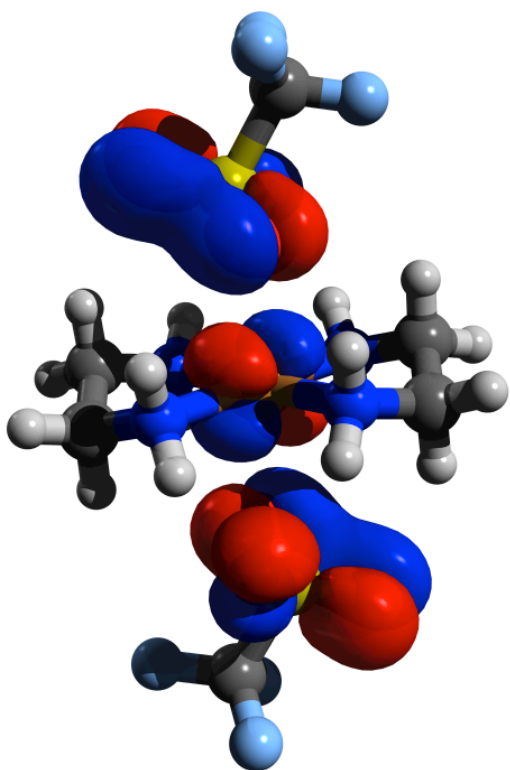

**Fig S1b;** Molecular orbital 110B of  $[\text{Cu}(\text{en})_2](\text{OTf})_2$

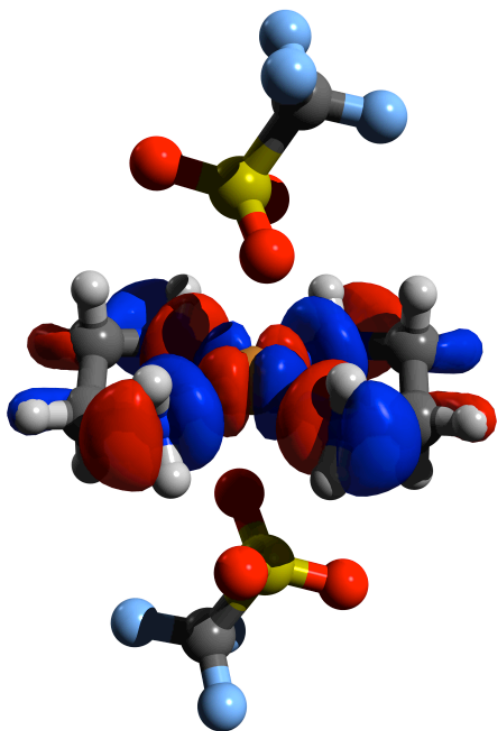

**Fig S1c;** Molecular orbital 122B of  $[\text{Cu}(\text{en})_2](\text{OTf})_2$

3. Additional X-band CW and pulsed EPR and ENDOR data.

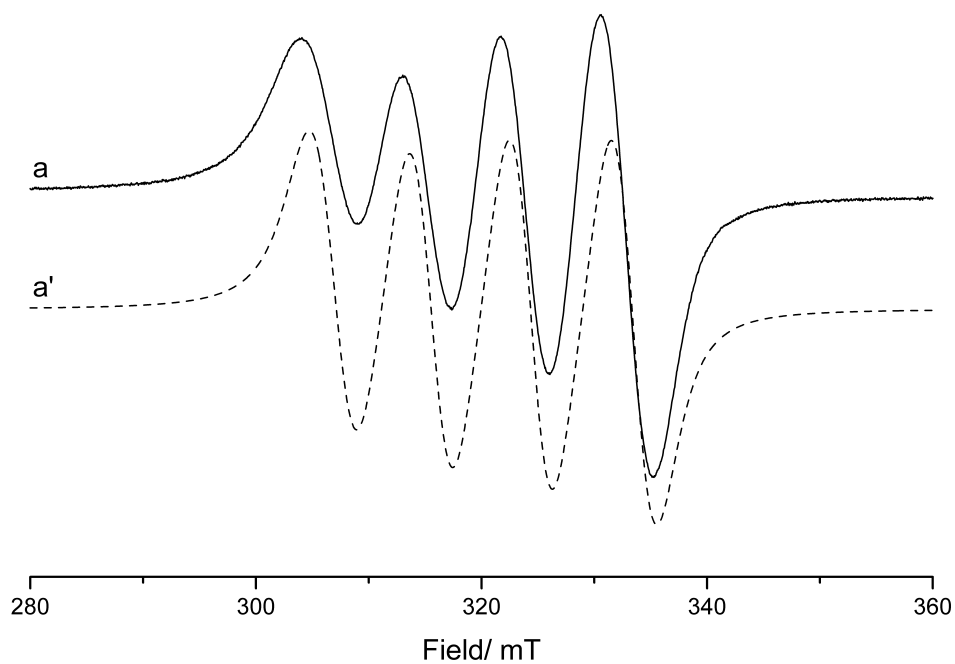

**Fig S2;** CW EPR spectrum (298 K) of  $[\text{Cu}(\text{en})_2](\text{OTf})_2$  dissolved in acetonitrile:tetrahydrofuran (1:1). a) experimental and a') simulation.

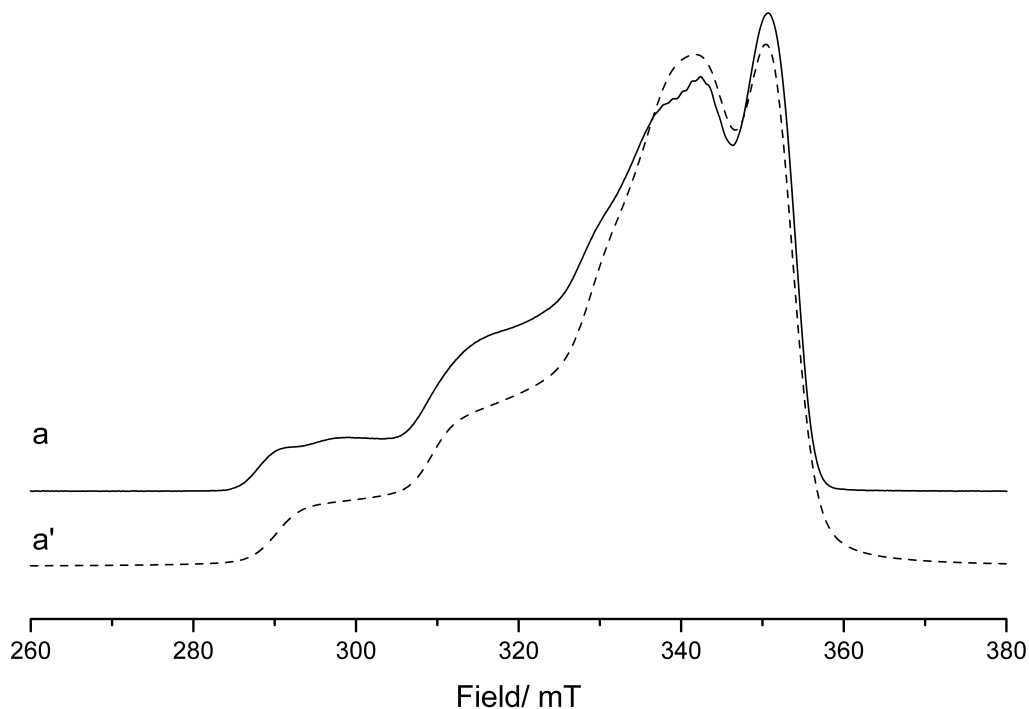

**Fig S3;** Field Sweep Echo Detected EPR spectrum (10 K) of  $[\text{Cu}(\text{en})_2](\text{OTf})_2$  a) experimental and a') simulation.

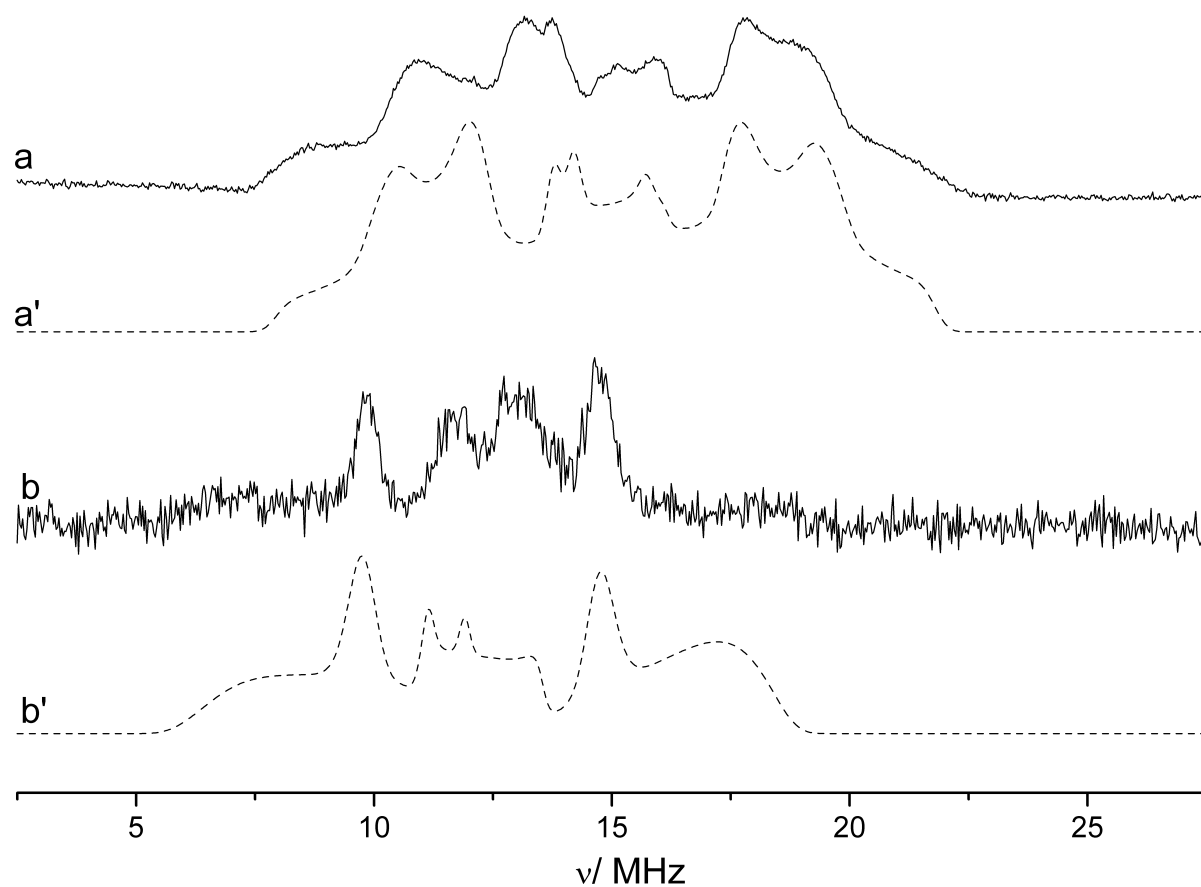

**Fig S4** Pulsed Davies ENDOR spectra of  $[\text{Cu}(\text{en})_2](\text{OTf})_2$  **1** recorded at a) 350 mT and b) 288 mT. Corresponding simulations are shown in a',b'. The spectra were taken at 10 K, with a repetition rate of 333 kHz. The pulse sequence  $\pi$ -T- $\pi/2$ - $\tau$ - $\pi$ - $\tau$ -echo using mw pulse lengths of  $t_\pi = 256$  ns,  $t_{\pi/2} = 128$  ns, and an interpulse time  $\tau$  of 820 ns was used. An rf  $\pi$  pulse of variable frequency and a length of 8  $\mu\text{s}$  was applied during time T of 10  $\mu\text{s}$ .

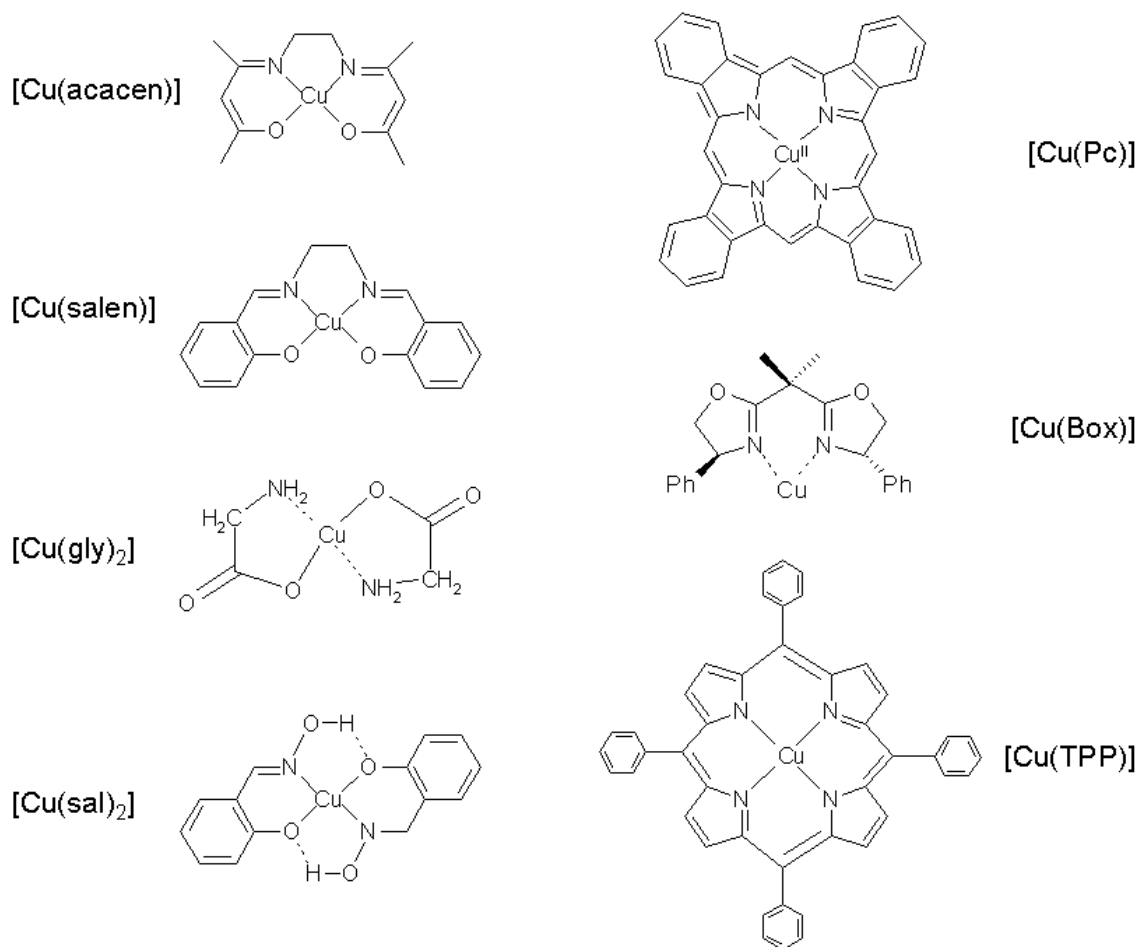

**Fig S5**; Schematic illustration of the Cu(II) complexes referenced in Table 3 (main text).
